# Supplementary material
Source: Royal Society of Chemistry journal article supplement (doi:10.1039/d6tc00437g)
Supplement: d6tc00437g1.pdf [file d6tc00437g1.pdf]

SUPPLEMENTARY INFORMATION

Soft-Glass Matrix Composite with preservation of the blue persistent luminescence

Victor Murilo Poltronieri da Silva<sup>1</sup>, Elaine A. de Mattos<sup>2</sup>, Gustavo Henrique de Magalhães Gomes<sup>3,4</sup>, Roger G. Fernandes<sup>2</sup>, Verônica C. Teixeira<sup>5</sup>, David Van der Heggen<sup>6</sup>, Philippe F. Smet<sup>6</sup>, Lucas C. V. Rodrigues<sup>2</sup>, Danilo Manzani<sup>1\*</sup>

<sup>1</sup>São Carlos Institute of Chemistry, University of São Paulo (IQSC-USP), São Carlos, SP, Brazil.

<sup>2</sup>Institute of Chemistry, University of São Paulo (IQ-USP), São Paulo, SP, Brazil.

<sup>3</sup>Center for Information Technology Renato Archer, Campinas, SP, Brazil.

<sup>4</sup>Institute of Pure and Applied Sciences, Federal University of Itajubá (UNIFEI), Itajubá, MG, Brazil

<sup>5</sup>Brazilian Synchrotron Light Laboratory (LNLS), Brazilian Center for Research in Energy and Materials (CNPEM), Campinas SP, Brazil.

<sup>6</sup>LumiLab, Department of Solid-State Sciences, Ghent University, Ghent, Belgium.

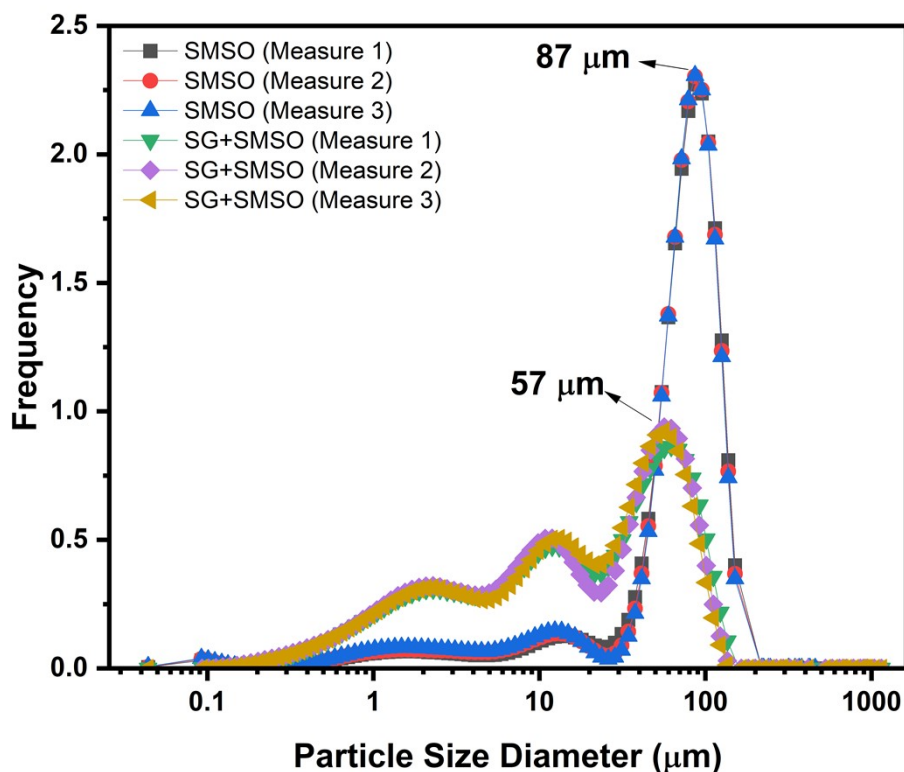

Figure S1. Particle Size Distribution of pure SMSO and the mixture SG+SMSO.

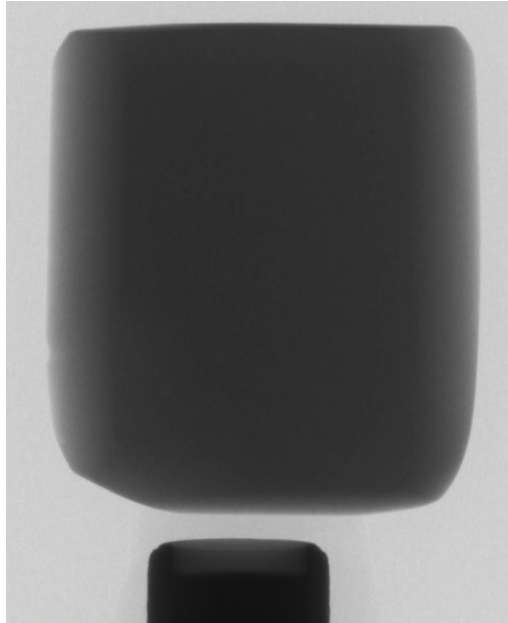

22

23 **Figure S2.** X-ray transmission image of the SGMC containing 1 wt.% of SMSO.

24

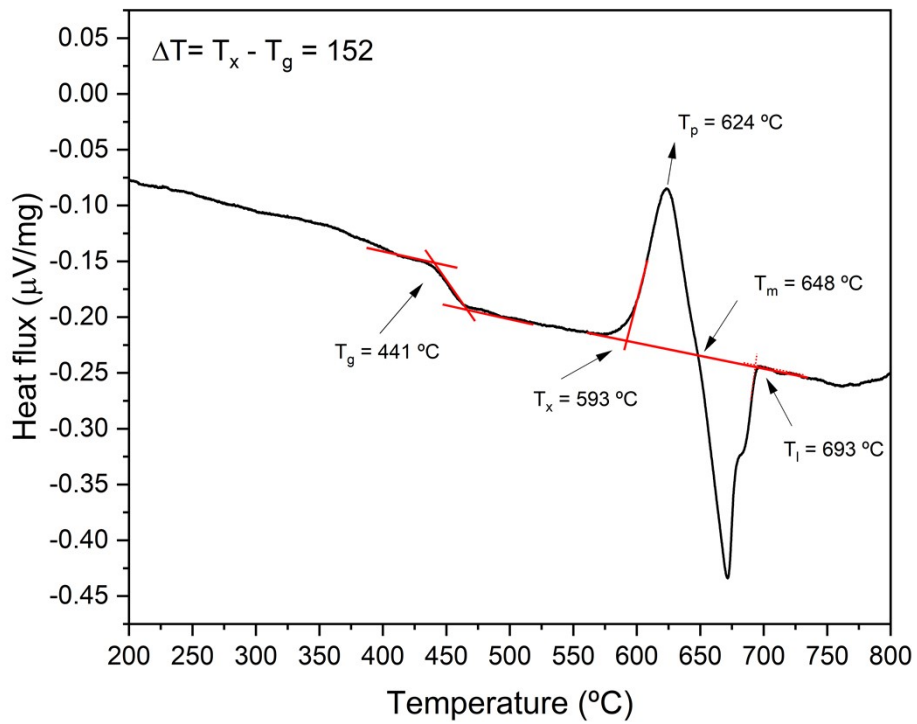

25

26 **Figure S3.** Differential Scanning Calorimetry (DSC) curve of SG bulk glass.

27

28

29

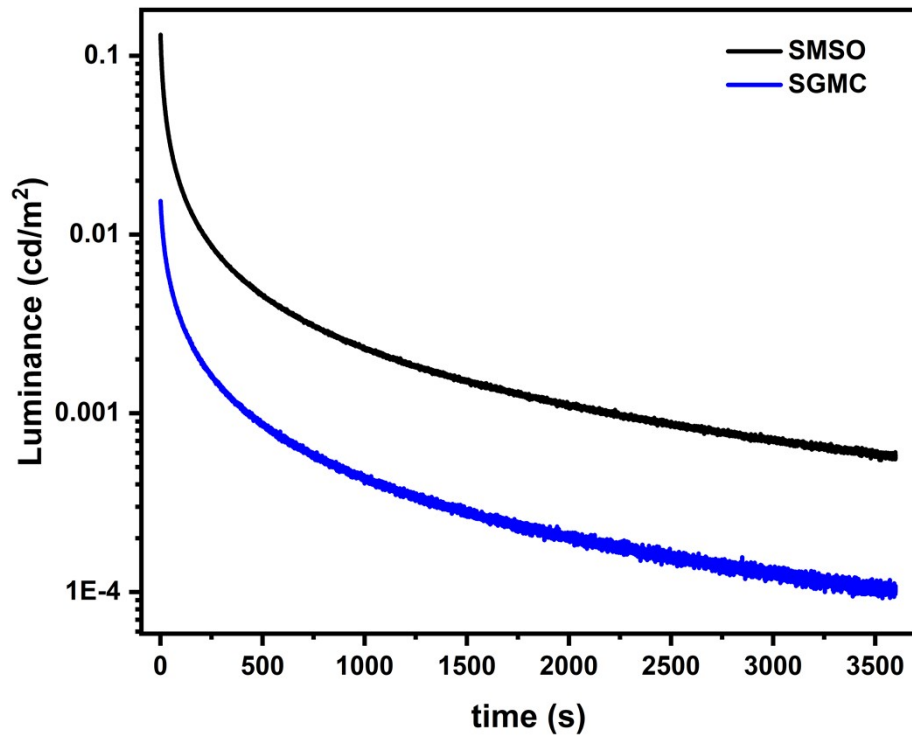

30

31 **Figure S4.** As measured afterglow curves of pure SMSO embedded in transparent polymer and  
 32 SGMC.

33

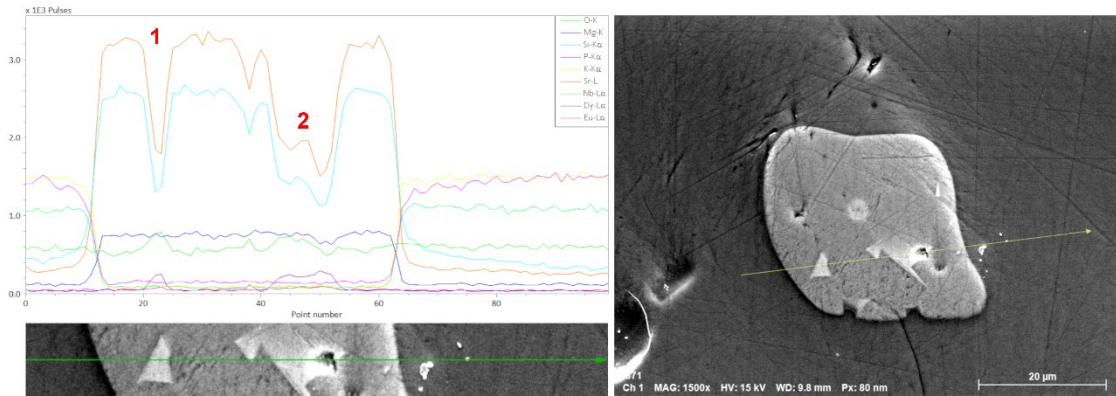

34

35 **Figure S5.** EDX line-scan of the particle in the SGMC sample.

36

37
